## Subject Index

---

- Acute renal failure 204  
Adrenal surgery 386  
 $\alpha$ -adrenergic receptor 341  
Age distribution 414  
Aortitis syndrome 446  
Artificial blood 109  
Ascending infection 273  
Autoimmunity 255
- Benign prostatic hypertrophy 414  
Bilateral ureterosigmoidostomy 420  
Biopsy 305  
Bladder carcinoma 437  
Bladder Neck 28, 46  
Bladder neck hypertrophy (Marion's disease) 129  
Bladder neck sclerosis 129  
Bladder pressure 103  
Bladder substitution 273  
Bladder tumors 255, 326  
Bladder tumors in children 420  
Bougie à boule 455
- Calculus 228  
Calicea systole and diastole 282  
Caliceal and pyramidal urodynamics 282  
Carcinoembryonic antigens 162  
Carcinoma of the prostate 305, 402  
Caryopycnotic index 245  
Chronic prostatitis-prostatopathy 129  
Chronic pyelonephritis 297  
Chronic renal failure 357  
Chronic renal insufficiency 204  
Cine/pressure/flow/cystourethrography 77  
Classification of incontinence 3  
Collagenous tissue 350  
Colposuspension 34  
Conduction velocity 100  
Congenital bulbular urethral stenosis 129  
Congenital hydronephrosis 350  
Continency by ileum invagination 273
- Continent intra-abdominal ileum pouch 273  
Continent urine reservoir 273  
Creation of normal micturition control 192  
Cryosurgery of the prostate 414  
Cushing's syndrome 386  
Cystectomy 420  
Cystometry 9, 16  
Cystourethrography 46  
Cystourethrostomy 54  
Cytological control 245
- Decreased urethral resistance 34  
Definition of incontinence 3  
Descent of urinary bladder 34  
Detrusor instability 9  
Diagnosis of renal tuberculosis 297  
Differential diagnosis 321  
Distal urethral stenosis 455  
Distensibility 28  
Disturbances of urodynamics 297  
Double-layer needle cannula 204
- Ejaculation 218, 341  
Electromyography 92, 369  
Electronic nappy 103  
Electrotherapy of the bladder 192  
Embryonal cell carcinoma of the testes 162  
Enuresis 85, 455  
Exchange, transfused rat 109  
Experimental 173  
Exponential model 16  
External urethral sphincter 72
- Fallopian tube 173  
Female incontinence 34  
 $\alpha$ -Fetoprotein 162
- Gambro perfusion apparatus 362  
Glyoxylic acid 465  
Gynecological diseases 297

- Haematuria 326
- Handicaps, extrinsic 3
- , intrinsic 3
- Hemangioma 237
- Hemodialysis 204
- Hepatoma 162
- Hormonal therapy 245
- Hydronephrosis 397
- Hyperglycemic condition 437
- Hyperoxaluria 465
- Hypertension 386
- Hypertension in Japanese 446
- Hypogastric nerve 218
- Hypomagnesemia 313
- Hysterectomy 381
  
- Ileum conduit 273
- Incontinence 33
- Incontinence after total prostatectomy 54
- Incontinence of faeces 3
- Incontinence of urine 3
- Incontinence, double 3
- , physical 3
- , cerebral (mental) 3
- , locomotor 3
- Internal urethral orifice 218, 341
- Internal urethrotomy 266
- Intramural bladder receptors 192
- Ionic and water kidney content 117
- Irradiation reaction 326
- Irrigating fluid 27
  
- Kidney 321, 369
- Kidney functions 109
- Kidney preservation 145, 362
- Kidney transplantation 357
- Koch's test 321
  
- Laboratory diagnosis 321
- LDH in perfusate 362
- Lioresal 63
- , ( $\gamma$ -aminobutyric-acid) therapy 63
- Low estrogen level 455
- Low temperature perfusion 117
- Lymph node metastases 402
- Lymphocele 433
  
- Lymphography 402
  
- Megalureter – hydronephrosis syndrome 129
- Metastasis 305
- Microsurgery 145
- Micturition control 192
- Micturition cystourethrography 34
- Mixed mesodermal tumor 420
  
- Na<sup>+</sup> transport 109
- Needle 305
- Nephroureterolithiasis 297
- Nervus pudendus 100
- Neurogenic bladder 72, 85, 92, 100, 192
- Neurogenic bladder disease 75
- Neurogenic bladder dysfunction 33, 63, 181
- Neurogenic component in incontinence 77
- Nodule 305
  
- 12 o'clock position 75
- Operative risk category 414
- Organic impotence 211
- Oxalic acid 465
  
- Pacemaker 369
- Paraplegics and urinary late effects 181
- Paraplegics with urinary complications 181
- Partial colpocleisis 381
- Pathogenesis of renal tuberculosis 297
- Pathological changes of paraplegics' urinary tract 181
- Pelvis 369
- Pelviureteral junction 350
- Percutaneous catheterization 204
- Perfusion flow rate 362
- Perineal 305
- Peripheral neurogenic lesion 99
- Peripyramidal muscle 282
- Polyacrylamide disk 162
- Posture change 9
- Pregnancy 9, 297
- Primary aldosteronism 386
- Primary and secondary reflux 273
- Prostatic cancer 245
- Prostatic obstruction 28

- Rat 465  
Recurrent urinary tract infection 455  
Renal autotransplantation 145  
Renal calculus 465  
Renal ischemia 145  
Renal preservation 117  
Renal transplant magnesium wasting 313  
Renal tuberculosis 297, 321  
Renal vein 332  
Renovascular hypertension 446  
Residual urine 33  
Retroaortic left renal vein 332  
Rhabdomyosarcoma 420
- Sacral roots 100  
Sarcoma botryoides 420  
Selective sacral denervation 85  
Seminoma 162  
Silicone penile prosthesis 211  
SLDH 437  
SLDH-V 437  
Smooth muscle 369  
Spina bifida 103  
Spinal cord lesion 63  
Splanchnic nerve 218  
Standard values 29  
Stepwise cystometry 16  
Stone composition 228  
Stone recurrence 228  
Stress incontinence 34, 46  
Striated perineal muscles 92  
Substitute 173  
Succinimide 465  
Supravesical urine diversion 273  
Surgical repair for pielouretal joint  
    stricture 397  
Suspension defect 46  
Sympatholytic treatment 33
- Takayasu's syndrome 446  
Technical details 29  
Total prostatectomy 54  
Transperineal 305  
Transplantation complication 433  
Transurethral resection of the prostate 414  
Transurethral sphincterotomy 75  
Transvaginal operation 381  
Tuberculin 321  
Tumor staging 402  
Tumors of testis 237  
Tunica albuginea testis 237
- Ureter 173, 369  
Ureteral complications 33  
Ureteropyelostomy 397  
Urethral pressure profile 27, 29  
Urethral resistance 28  
Urethral stricture 266  
Urethral valves 129  
Urethrometry 9  
Urge to void 192  
Urinary incontinence 99  
Urinary manometry 72  
Urinary stress incontinence 9  
Urine 465  
Urine loss 103  
Urine reabsorption 273  
Urodynamic evaluation 34  
Uroflowmeter 34
- Vegetative efferentation 192  
Vesicoureteral reflux 357, 455  
Vesicovaginal fistula 381  
Visceral handicaps 3  
Visco-elasticity 16  
Vitality test 362  
Voiding cystourethrogram 455
